# Supplementary material for: Contact-Mediated Bacterial Transmission and Infection Risk Dynamics in a Newly Opened Hospital Ward
Source: Research Square preprint supplement (doi:10.21203/rs.3.rs-8334074/v1), 2025-12-30
Supplement: Supplementary file 1 [file 827038f96913d42669709040.docx]

Supplementary information for

**Contact-Mediated Bacterial Transmission and Infection Risk Dynamics in a Newly Opened Hospital Ward**

Liyun An1, Xiaonan Liu2,3, Xiao Li4, Yixuan Chu5, Xiaoqiang Sun6, Junsheng Chu4#, Yong Nie7#

1 School of Biological Science and Technology, University of Jinan, Shandong, China

2 Institute for Environmental Genomics, The University of Oklahoma, Norman, OK, USA

3 School of Biological Sciences, The University of Oklahoma; Norman, OK, USA

4 Department of Neurosurgery, Beijing Tiantan Hospital, Capital Medical University, Beijing, China

5 Beijing National Day School, Beijing, China

6 The Department of Endodontics, School of Stomatology, Capital Medical University, Beijing, China

7 School of Mechanics and Engineering Science, Peking University, Beijing, China

# Corresponding authors:

*E-mail addresses:* [chujunsheng@sina.com](mailto:chujunsheng@sina.com) (J. Chu), [nieyong@pku.edu.cn](mailto:nieyong@pku.edu.cn) (Y. Nie)

**Supplemental figures**
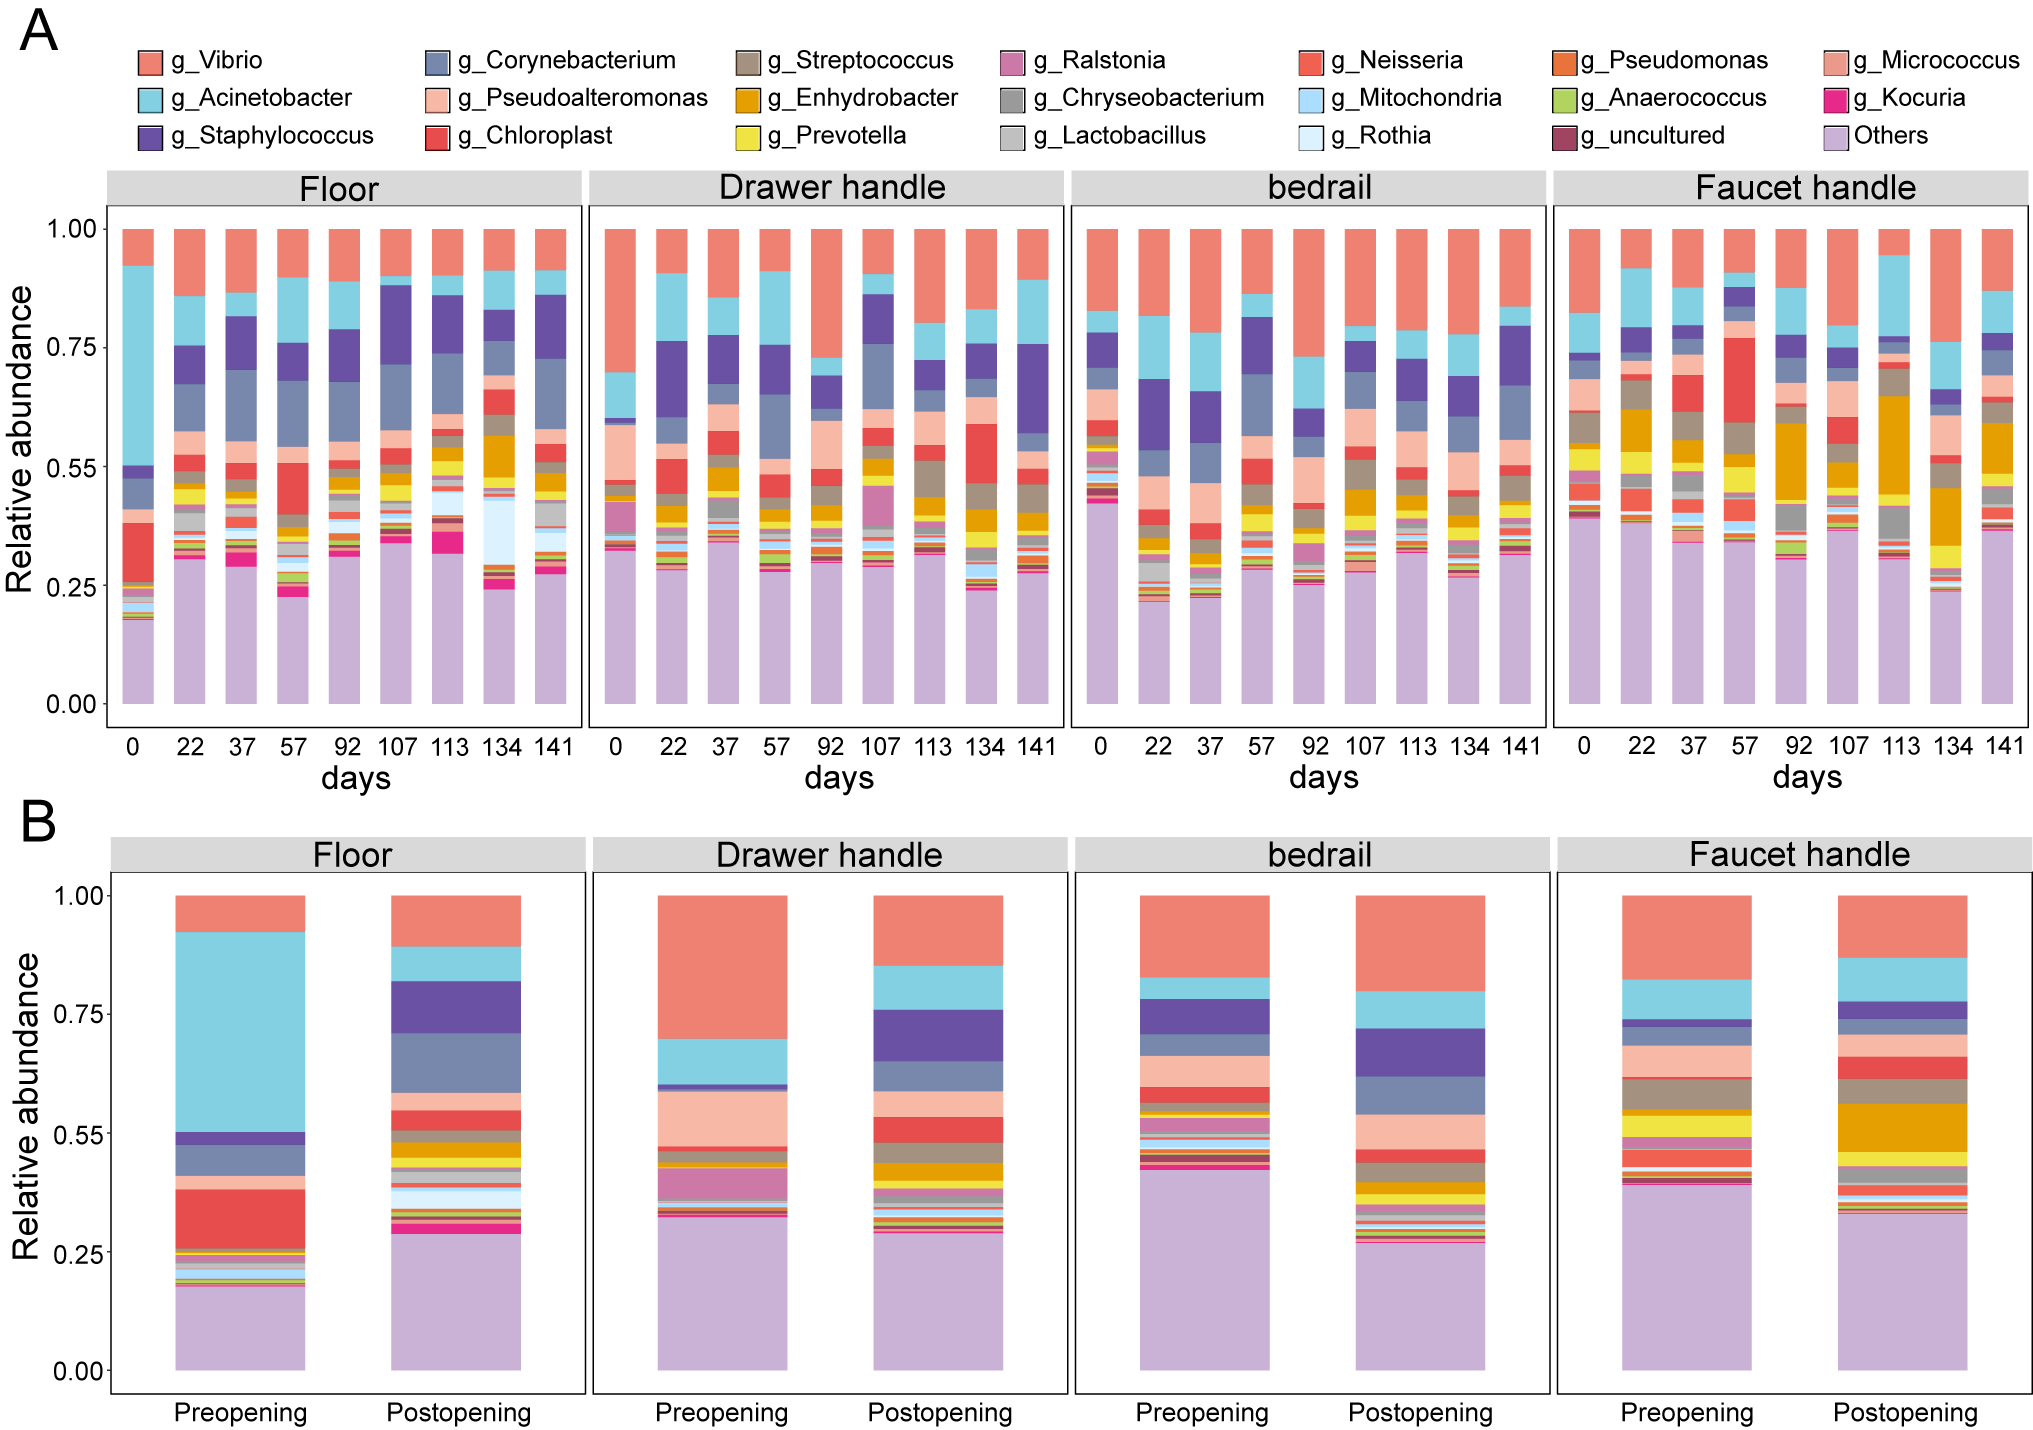


Supplementary Fig. 1 Changes in the relative abundance of top10 genera with time (A), and before and after hospital opening (B).


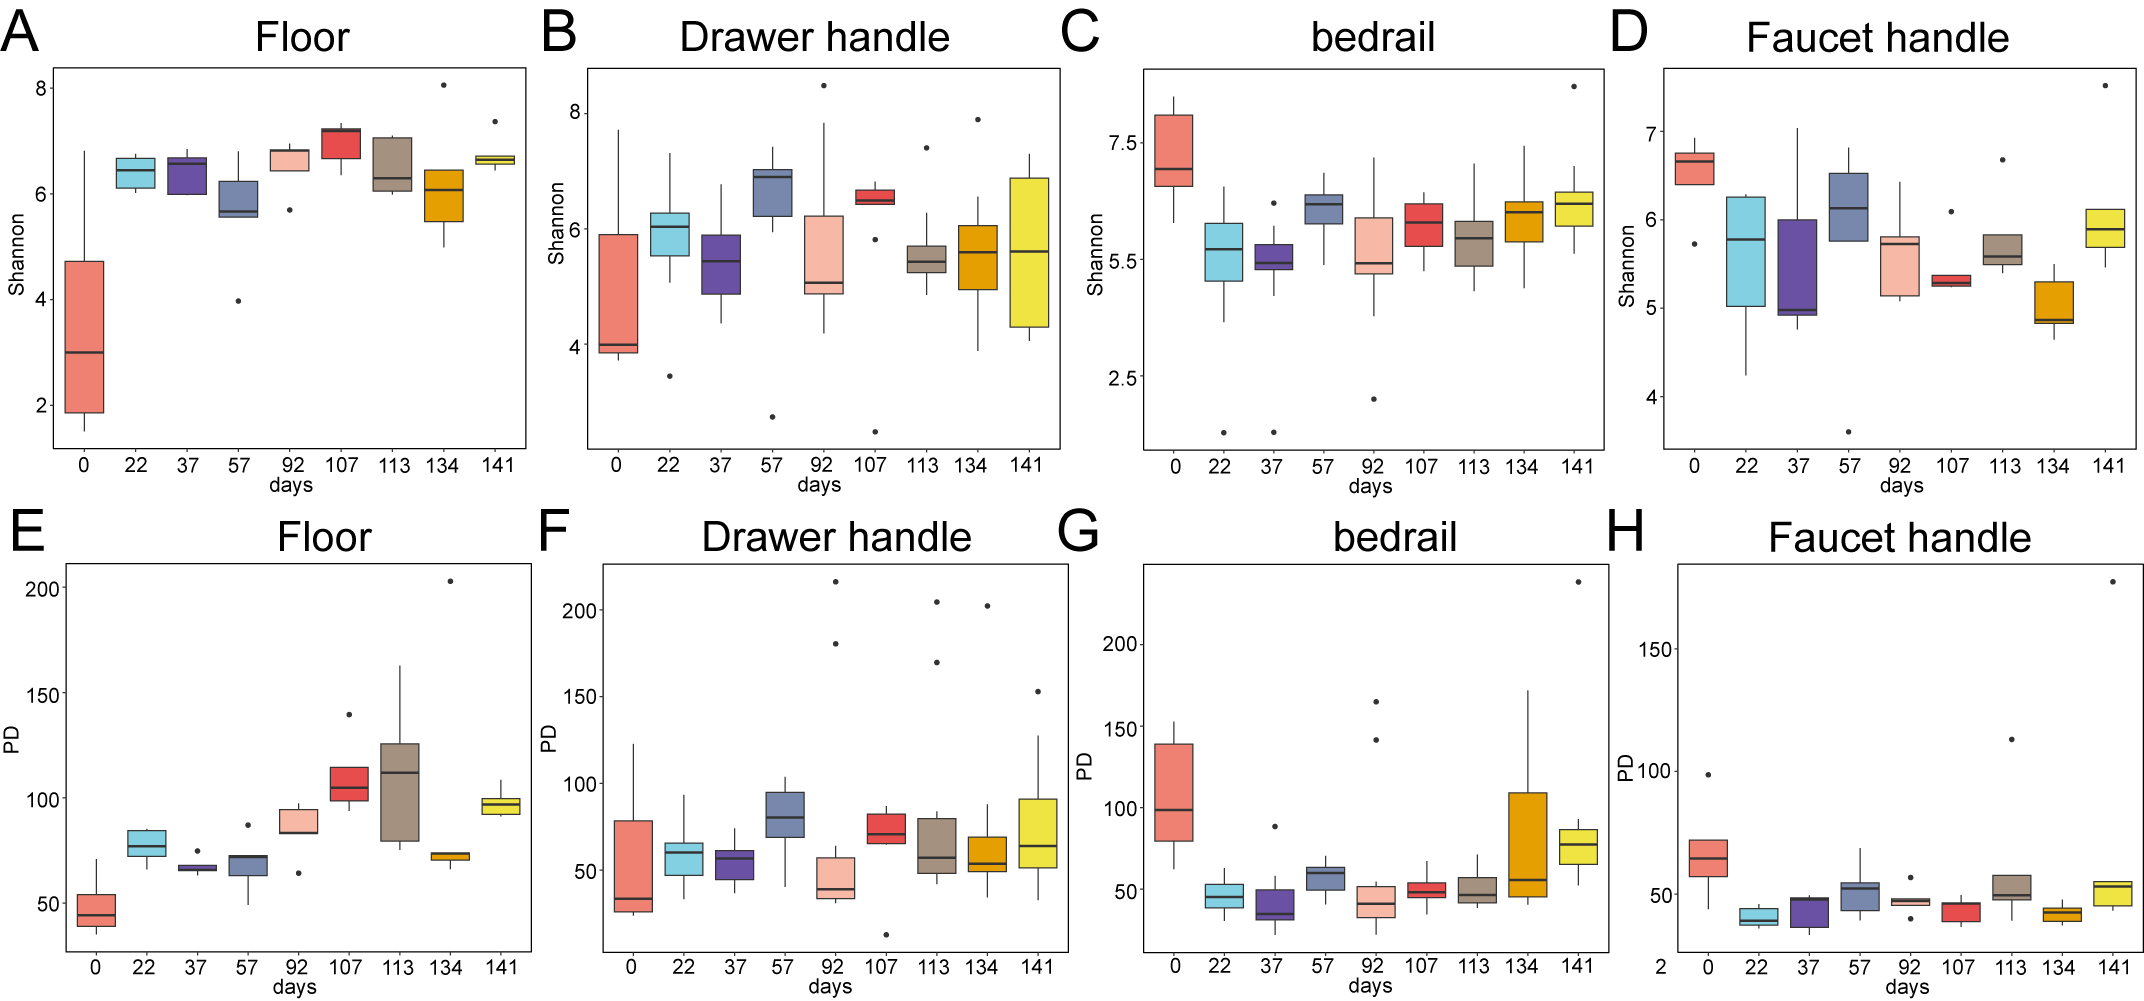


Supplementary Fig. 2 The changes in the Shannon diversity (A, B, C, D) and Faith’s PD (E, F, G, H) index of samples after hospital opening.


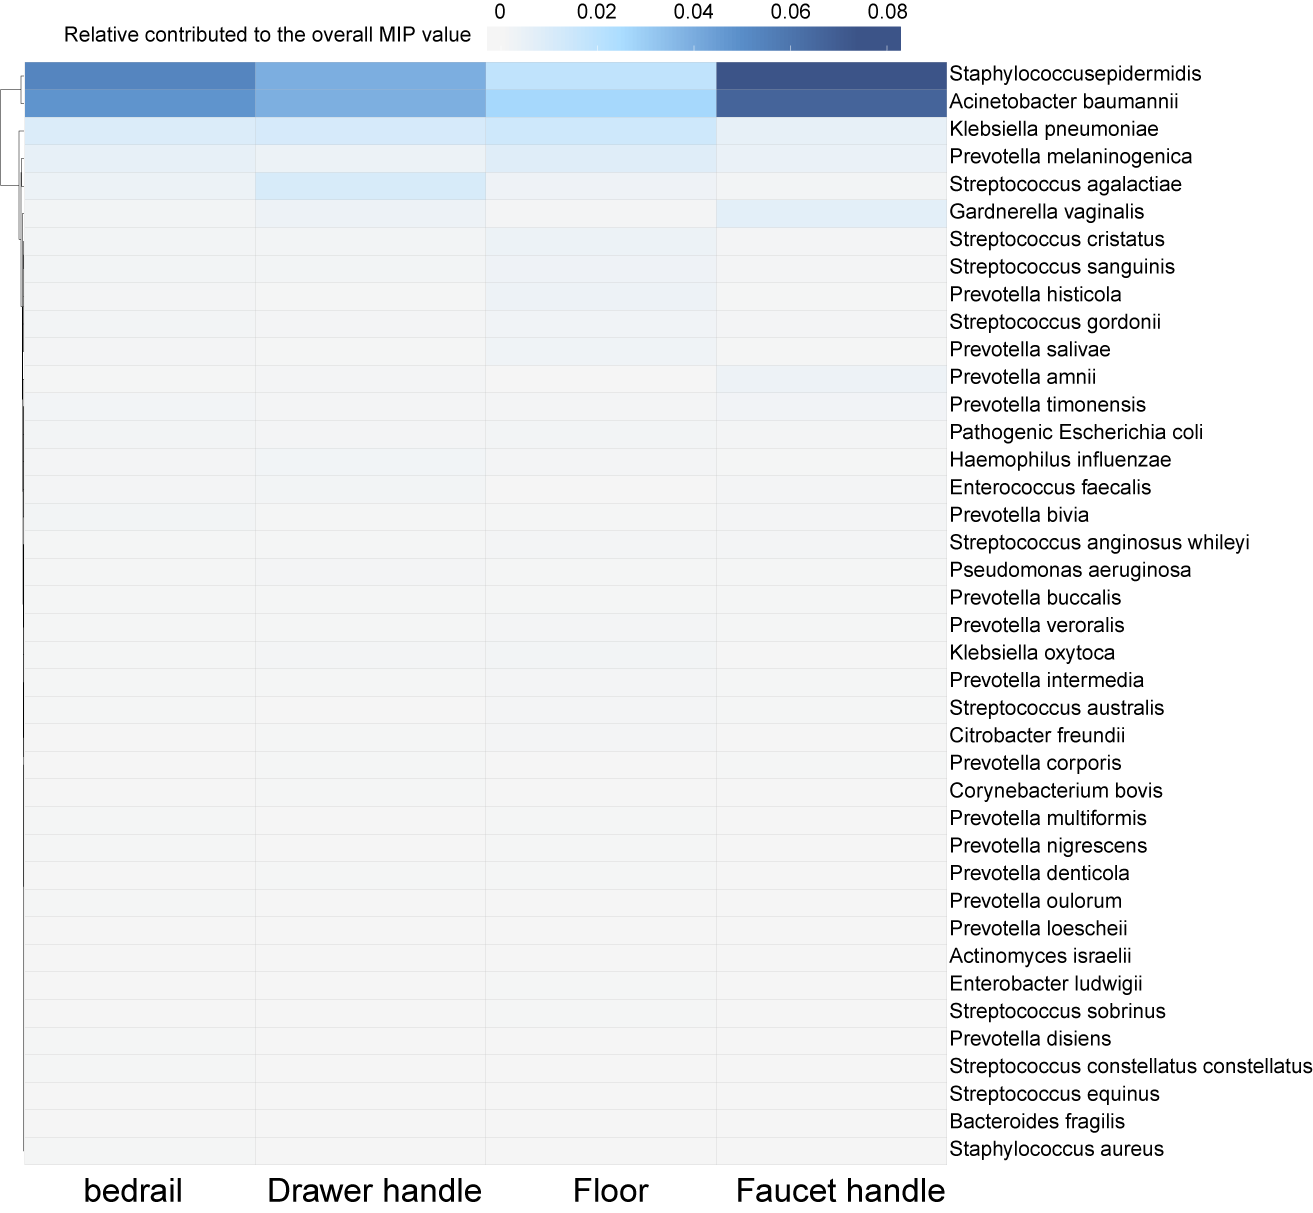


Supplementary Fig. 3 Heatmap showed the relative abundance (> 0.01%) of pathogens in hospital ward. The color indicated relative abundance.


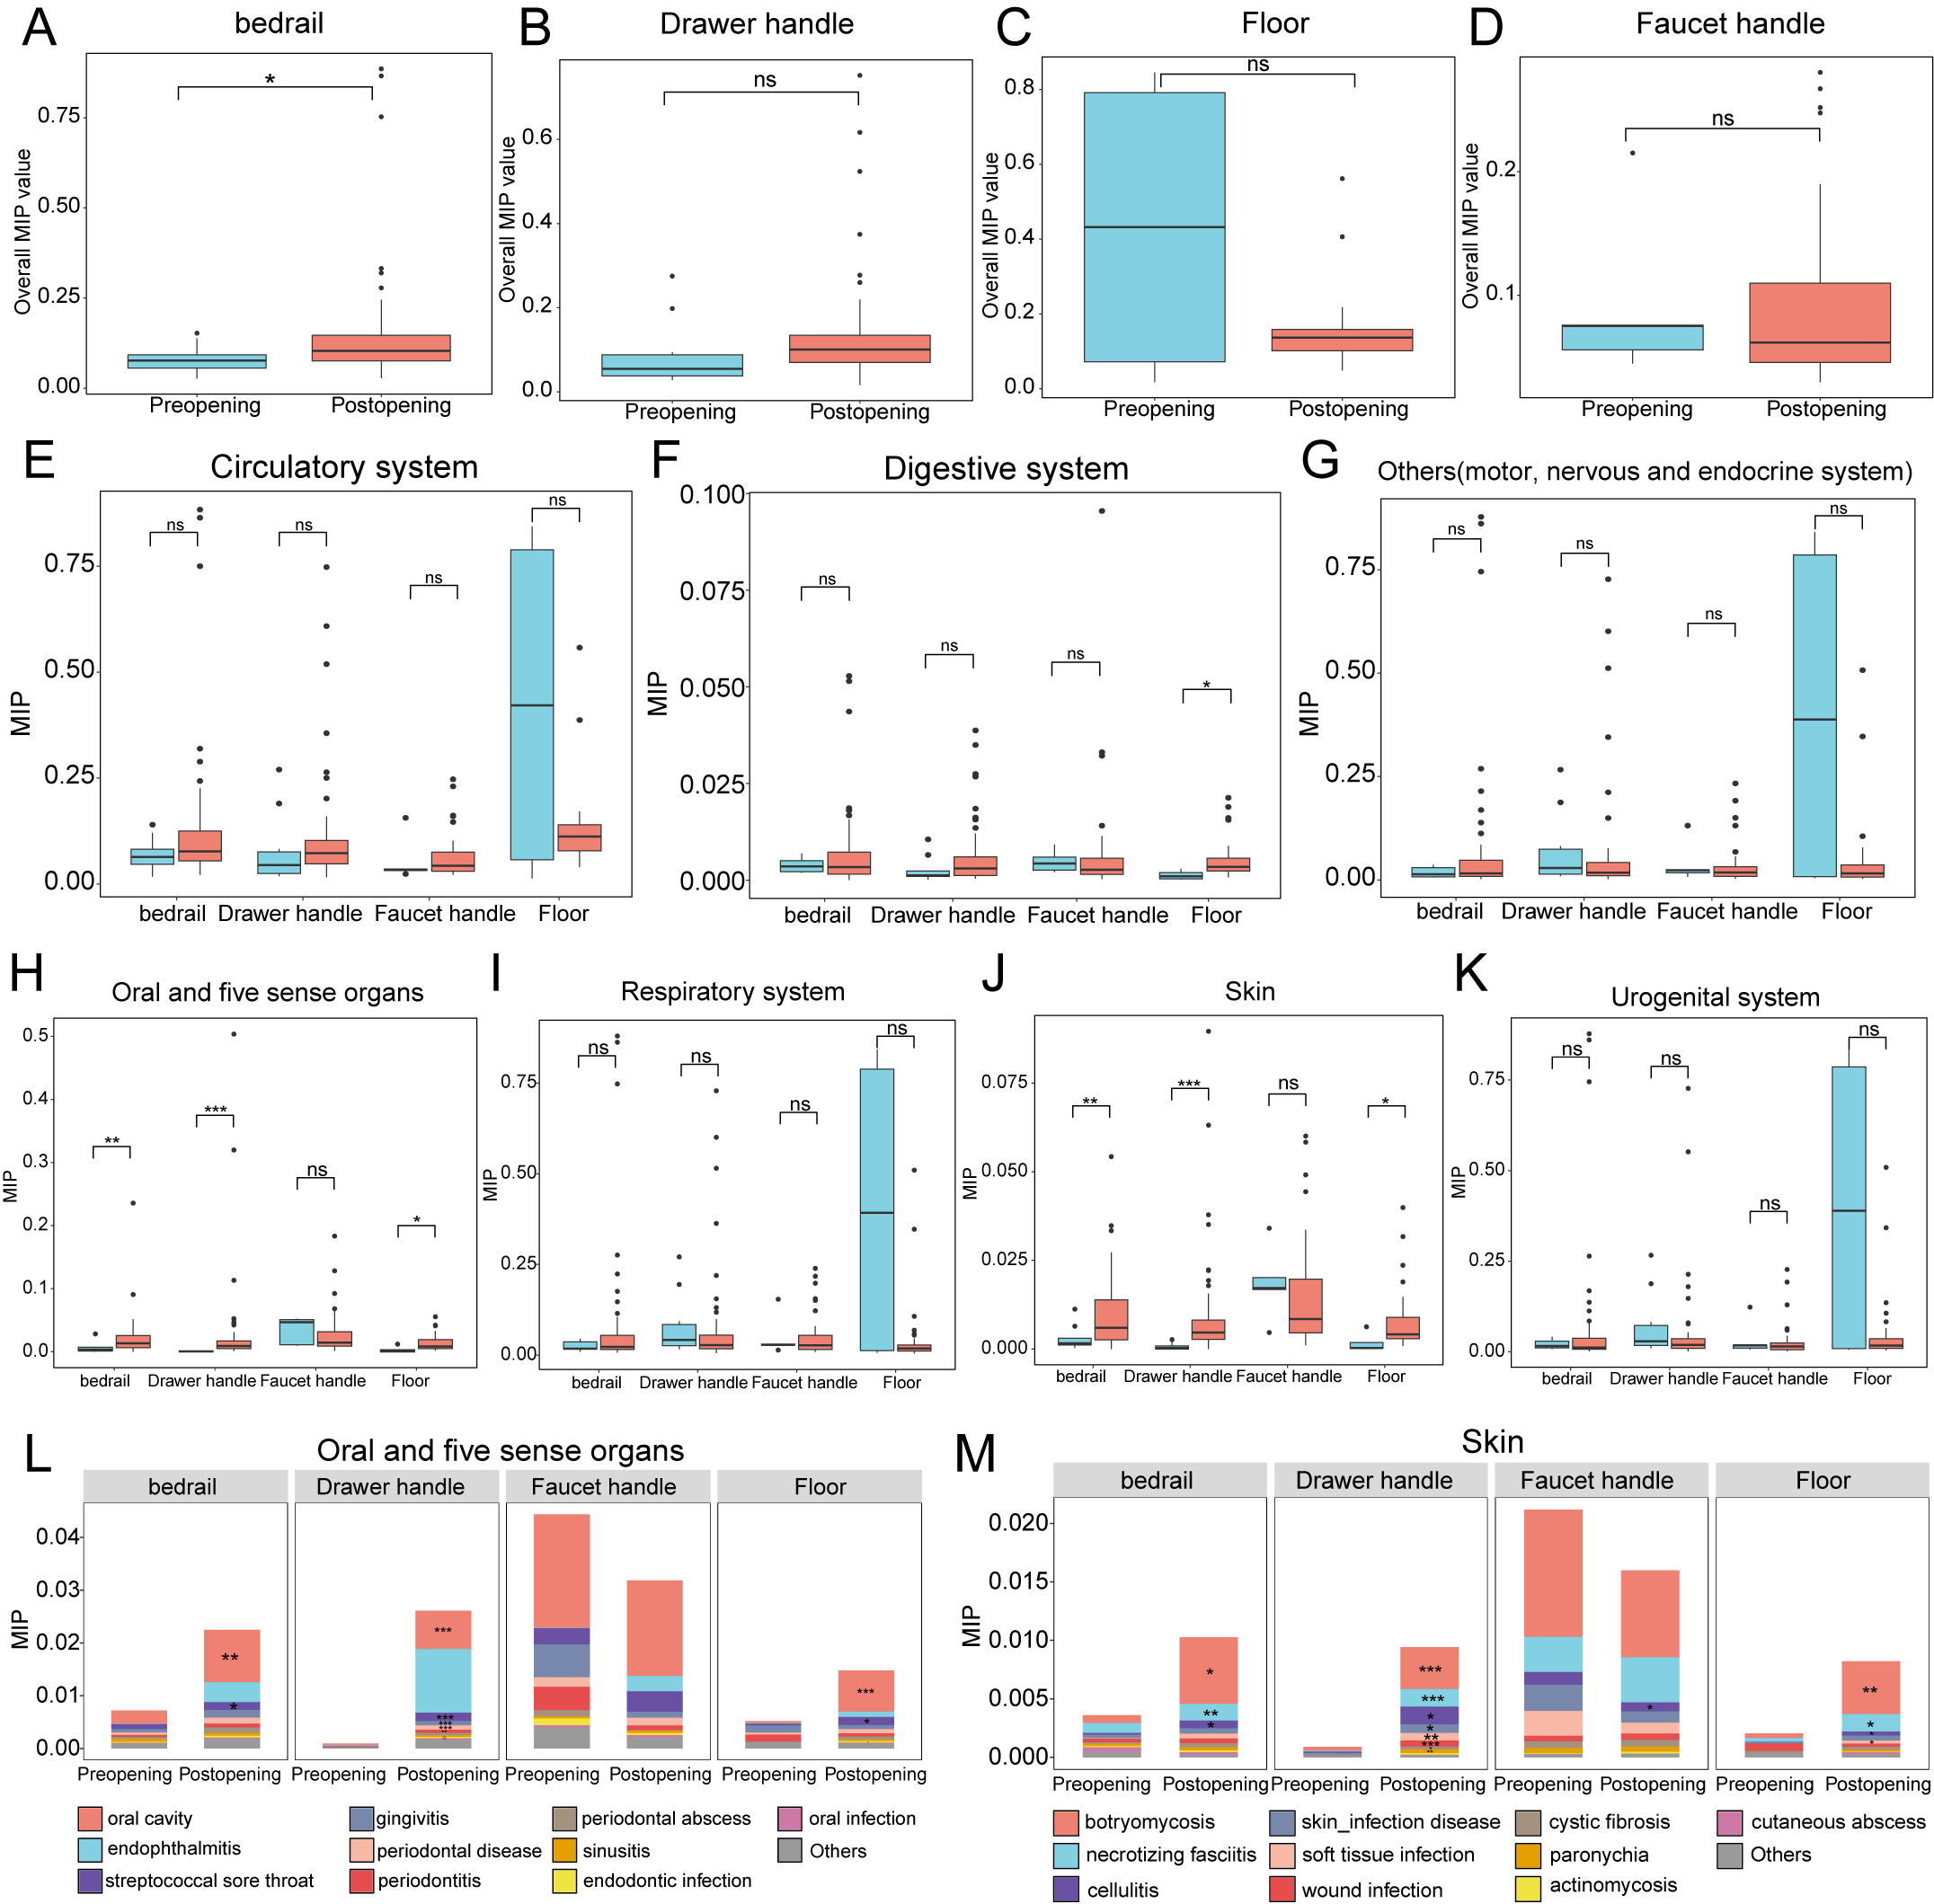


Supplementary Fig. 4 The change of potential pathogenic risks after hospital opening. (A, B, C, D) The overall MIP value in bedrails (A), drawer handles (B), floor (C), and faucet handles (D). (E, F, G, H, I, J, K) The changes in potential pathogenic risks associated with the circulatory system (E), digestive system (F), others (e.g., motor system, nervous system, and endocrine system) (G), oral and five sensory organs (H), respiratory system (I), skin (J), and urogenital system (K) after hospital opening. (L, M) The change of diseases related to oral and five sensory organs (L), and skin (M) after hospital opening.
